# Supplementary material for: Curvature and Rho activation differentially control the alignment of cells and stress fibers
Source: PubMed Central journal article supplement — Sci Adv. 2017 Sep 6;3(9):e1700150. doi: 10.1126/sciadv.1700150 (PMC5587136; doi:10.1126/sciadv.1700150), 2017-09-06
Supplement: 1700150_SM.pdf [file 1700150_SM.pdf]

## Supplementary Materials for **Curvature and Rho activation differentially control the alignment of cells and stress fibers**

Nathan D. Bade, Randall D. Kamien, Richard K. Assoian, Kathleen J. Stebe

Published 6 September 2017, *Sci. Adv.* **3**, e1700150 (2017)

DOI: 10.1126/sciadv.1700150

### **This PDF file includes:**

- fig. S1. MEFs and hVSMCs coalign on planar surfaces.
- fig. S2. Apical and basal SFs align in distinct patterns in MEFs in response to curvature.
- fig. S3. Lengths of apical and basal SFs in hVSMCs on small and large cylinders.
- fig. S4. Phalloidin intensity of isolated hVSMCs on coverslips treated with CN03.
- fig. S5. F-actin organization is not recovered after CN03 washout.
- fig. S6. Basal SFs remain after inhibition of ROCK.
- fig. S7. Assembly of cylinder substrates.

## Supplementary Material



**fig. S1. MEFs and hVSMCs coalign on planar surfaces.** Phase contrast image of MEFs (A) and hVSMCs (B) exhibiting nematic order on a flat tissue culture plastic surface.



**fig. S2. Apical and basal SFs align in distinct patterns in MEFs in response to curvature.** Angle distribution plots showing the directions in which basal and apical SFs are oriented (top) on small (**A**) and large (**B**) cylinders. The bottom plots show the longest 30% (Long;  $22.4 \mu\text{m} \leq L_{40\mu\text{m}} \leq 64.0 \mu\text{m}$ ;  $19.4 \mu\text{m} \leq L_{200\mu\text{m}} \leq 41.5 \mu\text{m}$ ), shortest 30% (Short;  $L_{40\mu\text{m}} \leq 12.3 \mu\text{m}$ ;  $L_{200\mu\text{m}} \leq 10.0 \mu\text{m}$ ), and the remaining 40% (Mid) SFs, where  $L_{R_c}$  denotes the length of stress fibers on cylinders with radius  $R_c$ . Axial and circumferential orientations are given by orientation angles of  $0^\circ$  and  $90^\circ$ , respectively. (**C**) Difference between the mean orientation angle of basal and apical SFs within individual cells. At least 165 SFs in 5 cells analyzed for each condition. Results are mean and SE, \*\*\*  $p \leq 0.001$  (Student's t-test).



**fig. S3. Lengths of apical and basal SFs in hVSMCs on small and large cylinders.** At least 272 SFs in at least 10 cells analyzed in each condition. Results are mean and SE, \*  $p \leq 0.05$ , \*\*\*  $p \leq 0.001$  (Student's t-test).



**fig. S4. Phalloidin intensity of isolated hVSMCs on coverslips treated with CN03.** At least 22 cells were analyzed in each condition in each of four independent experiments. Results show mean and SE, \*  $p \leq 0.05$  (Student's t-test).



**fig. S5. F-actin organization is not recovered after CN03 washout.** Six representative mapped images of phalloidin-stained hVSMCs on cylinders with  $R_c = 125 \mu\text{m}$ . Cells treated with  $5 \mu\text{g/ml}$  CN03 had predominantly basal SFs oriented in the circumferential direction both after being treated for 6 hours (**A**) and 48 hours after washing away the activator (**B**). The apical, axially-oriented SFs were more prominent in control cells ( $0 \mu\text{g/ml}$ ) at both time points (**C** and **D**). Arrow indicates cylinder axis orientation.



**fig. S6. Basal SFs remain after inhibition of ROCK.** Serum-starved MEFs were seeded on cylinders with  $R_c = 40 \mu\text{m}$  overnight before being treated with  $10 \mu\text{M}$  Y-27632 or an equivalent concentration of DMSO for 6 hours. Two representative mapped images are shown for each condition. Arrow indicates cylinder axis orientation. Scale bar is  $50 \mu\text{m}$ .



**fig. S7. Assembly of cylinder substrates.** (A) A 5 mm  $\times$  10 mm hole is first cut out of the center of a 1 mm thick slab of PDMS that is 25 mm in diameter. Then, 8 mm long sections of capillary tubes are placed over the hole and secured in place using liquid PDMS as the adhesive. (B) A 10 mm  $\times$  10 mm hole is cut out of the center of a second slab of PDMS; this second slab is also 25 mm in diameter but is 2 mm thick. Once the PDMS securing the cylinders has cured, the second slab is placed on top of the first slab. (C) The two-slab structure is placed in a 35 mm dish and secured in place by pouring liquid PDMS around the structure and curing it.
